# Supplementary material for: Development Projects and Economic Networks: Lessons from Rural Gambia
Source: Oxford University Press journal article supplement (doi:10.1093/restud/rdaa033), 2020-06-18
Supplement: rdaa033_supplementary_data.zip [file rdaa033_supplementary_data.zip]

Archive with 3 entries (3 files):
- Online Appendix.pdf
- Readme.pdf
- Replication Files.zip
